25 **Abstract** – Inclusive fitness theory has transformed the study of adaptive evolution since  
26 1964, contributing to significant empirical findings. However, its status as a theory has been  
27 challenged by the proposals of several alternative frameworks. Those challenges have been  
28 countered by analyses that use the Price equation and the regression method. The Price  
29 equation is a universal description of evolutionary change, and the partitioning of the Price  
30 equation using the regression method immediately yields Hamilton’s rule, which embodies  
31 the main tenets of inclusive fitness. Hamilton’s rule captures the intensity and direction of  
32 selection acting on social behaviour and its underlying causal structure. Recent work,  
33 however, has suggested that there is an anomaly in this approach: in some cases, the  
34 regression method fails to estimate the correct values of the variables in Hamilton’s rule and  
35 the causal structure of the behaviour. Here, I address this apparent anomaly. I argue that the  
36 failure of the simple regression method occurs because social players vary in baseline  
37 fecundity. I reformulate the Price equation and regression method to recover Hamilton’s rule  
38 and I show that the method correctly estimates its key variables. I show that games where  
39 baseline fecundity varies among individuals represent a more general set of games that unfold  
40 in class-structured populations. This framework supports the robustness and validity of  
41 inclusive fitness.

42  
43 **Keywords** -- class-structure, kin selection, natural selection, heterogeneity, game theory.

44

45

46

47

48

49

50 **Introduction**

51  
52 Inclusive fitness (Hamilton 1964b, a) is thought by some (e.g. Davies et al. 2012) to be one of  
53 the most significant contributions to evolutionary theory since Darwin's (1859) work on  
54 Natural Selection. It provides the theoretical foundations for topics that range from sex  
55 allocation (Charnov 1982, West 2010) and the evolution of altruism (Bourke 2011) to parent-  
56 offspring conflict (Trivers 1974, Haig 2002) and dispersal evolution (Hamilton and May  
57 1977, Clobert et al. 2012), and it contributes to our understanding of major evolutionary  
58 transitions in individuality (Maynard Smith and Szathmáry 1995, Boomsma 2009, Bourke  
59 2011). Despite its explanatory power, inclusive fitness is a concept that has also been the  
60 subject of a good deal of controversy. Some argue that inclusive fitness fails when games  
61 deviate from additivity (e.g. van Veelen 2009); others claim that it cannot fully explain group  
62 selection and that it requires weak selection or rare mutants (e.g. Wilson and Wilson 2007,  
63 van Veelen 2009); and still others suggest that it fails to provide a causal account of social  
64 behaviour and cannot be empirically tested (Allen et al. 2013, Nowak et al. 2017).

65  
66 The Price equation has been the main mathematical tool used to address these critiques of  
67 inclusive fitness (Queller 1992b, Gardner et al. 2011). It is a universal description of  
68 evolutionary change (Price 1970, 1972, Hamilton 1975, Frank 1997, Queller 2017) that  
69 supports the analysis of evolutionary quantitative genetics (Lande and Arnold 1983), indirect  
70 genetic effects (Moore et al. 1997), and multi-level selection (Okasha 2006). That the Price  
71 equation provides a framework for inclusive fitness was first proposed by Hamilton (1970). It  
72 has been developed by many since then (Grafen 1985, Queller 1992a, b, Frank 1997, Grafen  
73 2000, Gardner 2015, Grafen 2015), including those who deploy it to address critiques  
74 (Queller 1992b, a, Gardner et al. 2011, Rousset 2015). It defines fitness costs and benefits as

75 partial regression coefficients that emerge from an analysis of social behaviour (Queller  
76 1992b, a, Gardner et al. 2011, Rousset 2015). The regression approach has been suggested to  
77 demonstrate that inclusive fitness is as general as natural selection and that the actor-centric  
78 interpretation of behaviour remains the most robust paradigm in social evolution, both from  
79 the theoretical and empirical standpoints (Gardner et al. 2011, West and Gardner 2013).

80  
81 This view of social evolution, however, has been challenged. In particular, Allen et al. (2013)  
82 and Nowak et al. (2017) identified a set of games where the regression analysis fails to yield  
83 the correct values of the costs and benefits of the games' social interactions. This failure of  
84 the regression approach called into question the logical status of inclusive fitness within  
85 evolutionary biology, in particular raising the issue of whether inclusive fitness can in  
86 principle provide a correct account of social behaviour (Birch 2014, Birch and Okasha 2015,  
87 Akçay and Van Cleve 2016, Okasha 2016). Some are now starting to question whether  
88 inclusive fitness provides a solid framework for the development of novel hypotheses, the  
89 design of experiments, and the interpretation of empirical data (e.g. Gadagkar 2016, Whiteley  
90 et al. 2017).

91  
92 It is thus crucial to understand why specific types of games cause the regressions used in  
93 inclusive fitness models to break down. Here, I argue that variation in the baseline fecundity of  
94 social partners is the underlying cause of the failure of the simple regression method.  
95 Understanding this class of games requires an extended version of the Price equation and the  
96 regression method. I show that the extended version of the Price equation recovers a form of  
97 Hamilton's rule that while not exactly identical to Hamilton's original formulation it follows  
98 the same logic. I then show that the games in which individuals vary in baseline fecundity  
99 belongs to a wider set of class-structured games with broad empirical significance.

100

101

## The Price equation

102

103 The Price equation is a mathematical statement about how properties of a population of  
104 entities change over time (Price 1970, 1972). More precisely, it maps the relationship between  
105 two sets of entities and it describes how average quantities change from one set to the other  
106 (Frank 2012). Typically, one set is called the parental generation and the other the offspring  
107 generation. The entities of these two sets are connected by directed acyclic graphs that define  
108 multiple family trees, where the source nodes are the entities in the parental population and  
109 the outgoing nodes are the entities in the offspring population (Fig. 1A; Gardner 2020). The  
110 entities of the sets are assumed to vary in their breeding value, which can be inherited from  
111 parents to offspring with different degrees of fidelity. These assumptions, depicted in diagram  
112 1A, give rise to the Price equation, which describes changes in the breeding value that occur  
113 between the parental and offspring population (see Gardner 2008, Frank 2012 for reviews,  
114 and the appendix for details). Changes in mean breeding value can occur for two main  
115 reasons: natural selection and transmission biases (Frank 1997, Okasha 2006, Gardner 2008).  
116 Here, I focus on changes in breeding value due to the action of natural selection. Under these  
117 conditions, the most general form of the Price equation is given by

118

$$119 \Delta_{NS}\bar{g} = \frac{1}{\bar{w}} cov(w_i, g_i), \quad (1)$$

120

121 where:  $w_i$  is the reproductive success of the  $i$ th individual in the population;  $g_i$  is the breeding  
122 value of the  $i$ th individual;  $\bar{w}$  is the average reproductive success in the population;  $\bar{g}$  is the  
123 average breeding value in the population; and  $\Delta_{NS}\bar{g}$  denotes the change in the average  
124 breeding value between the parental and offspring generations owing to the action of natural

125 selection. This statement does not depend upon any assumption regarding the nature of the  
126 population; it therefore provides a general description of the action of natural selection (Price  
127 1970, Gardner 2008, Frank 2012). The Price equation tells us that the change in the average  
128 breeding value between generations is given by the covariance between the relative  
129 reproductive success of individuals and their breeding value.

130

## 131 **The Price equation extended**

132

### 133 The Price equation in a class-structured world

134

135 The standard derivation of the Price equation assumes that all entities in the population are  
136 identical except for their breeding value, as represented in diagram 1A (e.g. Price 1970,  
137 Gardner 2008, Frank 2012). Conceptually, we can modify this framework in three main ways.  
138 First, rather than two sets of entities, the parental and offspring populations, we can consider  
139 more than two sets of populations. For instance, we can imagine that entities in the first  
140 population give origin to entities in the second population, entities in the second population  
141 give origin to entities in the third population, and so forth. Second, rather than  
142 undifferentiated individuals (or entities), we can consider that individuals differ in a property,  
143 which we can call quality, and which we represent by different shapes in the diagram 1A.  
144 Third, we can allow the quality of individuals to influence both the number of entities they  
145 produce, as well as the quality (or class) of the entities they produce, where quality is any  
146 phenotype of an individual that affects its fitness (see diagram 1A). Although quality often  
147 defines classes (e.g. large and small individuals), classes exist even if there are no obvious  
148 phenotypic differences among individuals, such as when individuals occupy habitats of  
149 different quality (e.g. core and marginal habitats).

150

151 The aim is to discover how the average breeding value of a population in the future is affected  
152 by natural selection acting on the current generation. To do so, we partition total fitness into a  
153 current and future component. Current fitness, denoted by  $w_{ij \rightarrow l}$ , is the contribution of the  $i$ th  
154 individual in the current population to the offspring population, where  $j$  is the class of the  
155 focal individual and  $l$  is the class the individuals produced by the  $i$ th individual. Future  
156 fitness, denoted by  $v_l$ , is the contribution of a class- $l$  individual in the offspring generation to  
157 a population in the future. Future fitness, or reproductive value, is calculated using the  
158 “counter-factual” method by considering a neutral population from time  $t_0 + 1$  onwards  
159 (Frank 1998, Gardner 2015). This enables us to differentiate natural selection acting on the  
160 current generation from natural selection acting on subsequent generations (Frank 1998,  
161 Gardner 2015).

162

163 As in the previous section, the assumptions underlying diagram 1B give rise to a  
164 corresponding “Price equation” (see appendix for details), which is given by

165

$$166 \quad \Delta \bar{g} = \underbrace{\frac{1}{\bar{w}} \left( \sum_{j=1}^N u_j \sum_{l=1}^N v_l \text{cov}_W(w_{ij \rightarrow l}, g_{ij}) \right)}_{\text{within-class selection}} + \underbrace{\frac{1}{\bar{w}} \text{cov}_B(\bar{w}_{*j}, g_{ij})}_{\text{between-class covariance}}, \quad (2)$$

167

168 where:  $N$  is the different classes (or qualities) of individuals in the population;  $u_j$  is the  
169 frequency of individuals in class- $j$ ;  $g_{ij}$  is the breeding value of the  $i$ th individual in class- $j$ ; and  
170  $\bar{w}_{*j}$  is the mean fitness of individuals in class- $j$ . I use  $\text{cov}_W$  and  $\text{var}_W$  to denote covariances  
171 and variances within any given class, and  $\text{cov}_B$  and  $\text{var}_B$  when covariances and variances are  
172 taken between classes and across all individuals in the population.

173

174 This formulation of the Price equation isolates two key processes driving evolutionary  
175 change. First, the “within-class selection” terms describes statistical associations between  
176 breeding value and fitness within each class, with each covariance being weighted by the  
177 frequency of individuals within each class and by the reproductive values of the recipient  
178 classes. Note that breeding values may be positively associated with fitness in some classes,  
179 but negatively associated with fitness in others. The overall effect depends both on the  
180 strength of each association and on the frequency of individuals in each class and on the  
181 reproductive values of the recipient classes. The covariance terms within each class can be  
182 written as  $cov_W(w_{ij \rightarrow l}, g_{ij}) = \beta_{w_{ij \rightarrow l}, g_{ij}} var_W(g_{ij})$ . That is, for selection to operate within each  
183 class, there must be genetic variation within that class (i.e.  $var_W(g_{ij}) > 0$ ) and there must be  
184 a statistical association between breeding value and fitness ( $\beta_{w_{ij \rightarrow l}, g_{ij}} \neq 0$ ). If either of these  
185 conditions are not met, then there is no scope for selection to act within that class.

186

187 Second, the last term represents selection that operates between classes and / or class effects,  
188 which is given by the covariance between breeding value and the mean fitness of each class.  
189 If the between-class covariance occurs because of gene action, we call it “selection between  
190 classes”. Otherwise, we call it “class-effects”. The covariance between classes is positive  
191 whenever higher values of breeding value are statistically associated with higher values of  
192 class mean fitness (i.e. higher  $\bar{w}_{*j}$ ), and negative whenever higher values of breeding value  
193 are statistically associated with lower values of class mean fitness (i.e. lower  $\bar{w}_{*j}$ ). If  
194 individuals are randomly distributed across the different classes, then there is no statistical  
195 association between breeding value and class mean fitness. In that scenario, the selection  
196 between classes and / or class-effects are zero (i.e.  $cov_B(\bar{w}_{*j}, g_{ij}) = 0$ ), and selection within  
197 classes is the only force governing change in average breeding value.

198



199 Classes and the regression approach

200

201 In the previous section, I did not specify the relationship between fitness (or reproductive  
202 value) and breeding value. In the context of kin selection, the fitness of a focal individual will  
203 depend both on its own breeding value and on the breeding value of its partners. This  
204 relationship between reproductive success (the dependent variable) and breeding values (the  
205 independent or predictor variables) can be described by a statistical model as part of a  
206 regression analysis (Queller 1992b, a).

207

208 The form of the statistical model depends on the covariance expressions in the Price equation.  
209 Covariances in the first term of the Price equation are calculated across the set of individuals  
210 within each class, while the covariance in the second term is calculated across the set of all  
211 individuals in the population. Therefore, the regression analysis is performed within each  
212 class, when considering the first (within-class selection) term, but across all individuals, when  
213 considering the second (between-class covariance) term.

214

215 *Within-class selection* -- Let us start by focusing on the regression analysis within each class.

216 For each class, I denote the intercept of the statistical model by  $\beta_{0j}$ , where  $j$  represents the  
217 focal class. In addition, the fitness of a focal individual in class- $j$  depends on the breeding  
218 value of the focal individual, on the breeding value of the individuals in the same class, and  
219 on the breeding value of individuals in other classes. Thus, the estimated fitness of the focal  
220  $i$ th individual in class- $j$  can be written as

221

$$222 w_{ij \rightarrow l} = \beta_{0j \rightarrow l} + \beta_{ij \rightarrow l} g_{ij} + \sum_{\sigma \in \Omega} \beta_{i\sigma \rightarrow j \rightarrow l} G_{i\sigma} + \varepsilon_j \quad i \in (1, \dots, n_j) \quad (3)$$

223

224 where:  $\beta_{ij \rightarrow l}$  is the partial regression coefficient that gives the effect of the focal individual's  
225 breeding value on its own fitness when the focal individual produces class- $l$  individuals;  
226  $\beta_{i\sigma \rightarrow j \rightarrow l}$  is the partial regression coefficient that gives the effect of a class- $\sigma$  social partner on  
227 the fitness of the focal class- $j$  individual when the focal individual produces class- $l$   
228 individuals;  $g_{ij}$  is the breeding value of the focal individual;  $G_{i\sigma}$  is the breeding value of the  
229 focal individual's class- $\sigma$  social partners;  $n_j$  is the number of individuals in class- $j$ ; and,  
230 finally,  $\varepsilon_j$  is the uncorrelated error between the observed and estimated values.

231  
232 *Between-class covariance* -- I now focus on the “between-class covariance” term in the Price  
233 equation (equation (2)). Let each class be defined by its mean fitness  $\bar{w}_{*j}$ , and denote  $\sigma_{ij}$  as the  
234 class phenotype, which is defined in relation to the mean fitness of class- $j$ . Specifically, I  
235 define the class phenotype of the  $i$ th individual in class- $j$  as  $\sigma_{ij} =$   
236  $(\bar{w}_{*j} - \min(\bar{w}_{*j}))/\max(\bar{w}_{*j} - \min(\bar{w}_{*j}))$ , such that the class phenotype  $\sigma_{ij}$  is bounded  
237 between 0 and 1. This will not affect the calculations because I am simply rescaling the mean  
238 fitness of the class. The mean fitness of an individual in a class- $j$  can then be described by the  
239 following model

$$240$$
$$241 \bar{w}_{ij} = \beta_{c,0} + \beta_c \sigma_{ij} + \varepsilon_{ij} \quad i \in (1, \dots, n_j), \quad (4)$$
$$242$$

243 where  $\beta_{c,0}$  is the intercept, and  $\beta_c$  is the effect of the class phenotype on mean fitness. I can  
244 now replace this equation in the “between-class covariance” term in the Price equation  
245 (equation (2)) to obtain

$$246$$
$$247 \text{cov}_B(\bar{w}_{*j}, g_{ij}) = d_c r_c \text{var}_B(g_{ij}). \quad (5)$$

248

249 where  $r_c = cov_B(\sigma_{ij}, g_{ij}) / var_B(g_{ij})$  is the regression of breeding value on class phenotype,  
250  $d_c = \beta_c$  is the effect of class phenotype on mean class fitness. The regression of breeding  
251 value on class phenotype,  $r_c$ , can be seen as a “class coefficient” that contains information  
252 about how breeding value is spread across the different classes. The right-hand side of  
253 equation (5) has a pleasant interpretation. The partial coefficient of correlation  $\beta_c$  gives the  
254 effect of class phenotype on the mean fitness of an individual; the class coefficient  $r_c$  gives  
255 the association between breeding value and class; and  $var_B(g_{ij})$  gives the additive genetic  
256 variance in the population. We can now pinpoint the conditions under which the covariance  
257 between classes (i.e. selection between classes and / or class-effects) is zero. First, the  
258 covariance between classes is zero when the genotypes are uniformly distributed among all  
259 classes, and therefore when the mutant and neutral allele occur in the same proportions within  
260 each class (i.e.  $r_c = 0$ ). Second, the covariance between classes also vanish when class does  
261 not affect mean fitness (i.e.  $d_c = 0$ ). Third, the covariance between classes is zero in the  
262 absence of additive genetic variance in the population (i.e.  $var_B(g_{ij}) = 0$ ).

263

### 264 **Hamilton’s rule in a class-structured world**

265

266 From the Price equation and the regression analysis, Hamilton’s rule for different forms of  
267 social behaviour can be derived. Here, I will focus on two forms of behaviours: first,  
268 behaviour that affects the fecundity of both actors and recipients (fecundity effects); second,  
269 behaviour that affects the survival of both actors and recipients (survival effects).

270

271 I start with a general model for the fitness of a focal individual and allow it to derive fitness  
 272 from the production of offspring and from its own survival. I define the class-specific fitness  
 273 of a focal individual as

$$274$$

$$275 w_{ik \rightarrow l} = w_{ik \rightarrow l}^s + w_{ik \rightarrow l}^f, \quad (6)$$

$$276$$

277 where  $w_{ik \rightarrow l}^f$  is the fecundity component, and  $w_{ik \rightarrow l}^s$  is the survival component of fitness.

278

### 279 Fecundity effects

280

281 When focusing on fecundity alone, I assume that there is standing additive genetic variance  
 282 for fecundity but not for survival. Because fecundity is the trait of interest, I need to define  
 283 how fecundity influences the overall reproductive success of a focal individual. Let the  
 284 reproductive success of the  $i$ th individual in class- $k$  through offspring that become class- $l$   
 285 individuals be given by  $w_{ik \rightarrow l}^f = f_{ik} q_l$ , where  $f_{ik}$  is the fecundity of the  $i$ th class- $k$  individual  
 286 and  $q_l$  is the fraction of rank- $l$  offspring produced by a focal mother. Here I assume that  
 287 mothers vary in their fecundity, but they produce the same proportions of the different types  
 288 of offspring.

289

290 I now need to define how social interactions unfold. Let actors belong to class- $\alpha$ , and  
 291 recipients belong to class- $\rho$ , with  $\rho \in \Theta$ , where  $\Theta$  is the class of all recipients. From equation  
 292 (2), I obtain

$$293$$

$$294 \bar{w} \Delta \bar{g} = u_\alpha \overbrace{\left( -\hat{c}_\alpha + \sum_{\rho \in \Theta} \hat{b}_{\alpha \rightarrow \rho} r_{\alpha \rho} \right)}^{\text{Hamilton's rule}} \text{var}_W(g_{i\alpha}) \bar{V} + d_c r_c \text{var}_B(g_{ij}) \bar{V}. \quad (7)$$

295  
 296 where:  $-\hat{c} = \beta_{i\alpha}$ ,  $\hat{b}_{\alpha \rightarrow \rho} = u_{\rho} \beta_{i\rho \rightarrow \alpha} / u_{\alpha}$ ,  $r_{\alpha\rho} = cov_W(g_{i\rho}, g_{i\alpha}) / var_W(g_{i\alpha})$ , and  $\bar{V} = \sum_{l=1}^N q_l V_l$   
 297 is the expected reproductive value of offspring (see Appendix for details). Note that the only  
 298 assumptions are that additive genetic variation affects fecundity alone, and that there is no  
 299 transmission of class from parents to offspring. The interpretation of this form of Hamilton's  
 300 rule is straightforward, closely following the canonical interpretation. The focal actor pays a  
 301 cost  $c_{\alpha}$  to provide a benefit to a set of recipients  $\Theta$ . Each recipient enjoys a benefit  $b_{\alpha \rightarrow \rho}$ ,  
 302 which must be depreciated by the coefficient of relatedness  $r_{\alpha\rho}$  between actor and recipient.

303  
 304 Survival effects

305  
 306 Now consider survival effects. Here I assume that there is standing genetic variation for  
 307 survival, but not fecundity, and therefore the fecundity component of fitness does not affect  
 308 our calculations. The fitness of a mother can be written as  $w_{ik \rightarrow m}^S = s_{ik \rightarrow m}$ , where  $s_{ik \rightarrow m}$  is a  
 309 mother's survival probability. Performing the regression analysis outlined in the preceding  
 310 section, I find that the mean change in breeding value due to the action of natural selection  
 311 becomes

$$312 \quad \bar{w} \Delta \bar{g} = u_{\alpha} \left( \overbrace{-\hat{c} v_{i\alpha} + \sum_{\rho \in \Theta} \hat{b}_{\alpha \rightarrow \rho} v_{j\rho} r_{\alpha\rho}}^{\text{Hamilton's rule}} \right) var_W(g_{i\alpha}) + d_c r_c var_B(g_{ij}) \quad (8)$$

314  
 315 where:  $v_{i\alpha}$  is the future reproductive value of the actor, and  $v_{j\rho}$  is the future reproductive  
 316 value of recipients. Thus, under survival effects, I find that the estimated costs and benefits  
 317 must be weighted by the expected reproductive value of actor and recipients, respectively.  
 318 Here the little  $c$ 's and  $b$ 's denote short-term costs and benefits, with reproductive value

319 converting short-term costs and benefits into long-term fitness effects. Nevertheless, the  
320 general form of Hamilton's rule remains identical to more standard forms of Hamilton's rule.

321

### 322 **Detecting inclusive fitness**

323

324 Let me now illustrate how this framework can be used to analyse and understand concrete  
325 evolutionary games. In particular, I will employ the framework to analyse the examples used  
326 by Allen et al. (2013) and Nowak et al. (2017) to identify several types of evolutionary games  
327 in which the simple Price equation-regression approach to social evolution breaks down. I  
328 then discuss examples that explicitly contrast the simple regression analysis with one  
329 enhanced by the class-structured form of the Price equation. I first consider a game where  
330 individuals associate with each other but no real social transactions occur (cf. Fig. 1 and Fig.  
331 2A in Allen et al. 2013). Next, I consider a game in which high-fecundity individuals help  
332 low-fecundity individuals (cf. Fig. 2C in Allen et al. 2013). Then, I consider a game in which  
333 low-fecundity individuals inflict a cost on high-fecundity individuals (cf. Fig. 2B in Allen et  
334 al. 2013). I will focus on selection between consecutive generations. Further, I assume that the  
335 between-class covariance is not due to the action of genes, and therefore I will use the term  
336 "class-effects" to refer to this covariance. I will return to this subject below.

337

### 338 Anomalies in previous literature

339

340 Most of the anomalies identified by Allen et al. (2013) and Nowak et al. (2017) occur because  
341 they did not take into account the underlying class-structure of the games. When a population  
342 has class-structure, gene frequency change can occur because of within-class selection or  
343 because of a nonzero between-class covariance (due to either selection or class-effects). If one

344 does not properly represent the classes in the Price equation, then selection is compressed into  
345 a single regression coefficient that includes both selection within classes and the covariance  
346 between classes; that move affects the estimates of costs and benefits of behaviours.

347

348 Let us consider the game provided in Fig. 1 in Allen et al. (2013). First, because individuals  
349 differ in their baseline fitness, which can take the values 4, 2 and 0, class must be taken into  
350 account. Second, because one class is composed of a single individual – i.e. there is a single  
351 individual with baseline fitness 4 – there is no scope for selection to operate within that class.  
352 Third, because the class of individuals with baseline 2 is composed of genetically identical  
353 individuals, there is no scope for selection to operate within that class as well. Fourth, while  
354 there is scope for selection within the class of individuals with baseline 0, the regression of  
355 breeding value on fitness is zero, and therefore selection within the class of individuals with  
356 baseline 0 is null as well. Thus, all change in gene frequency must occur because of a nonzero  
357 covariance between classes (i.e. class-effects). If our framework is correct, class-effects, as  
358 given by equation (5), must be equal to total selection, as given by the standard Price equation  
359 in equation (1). That is,  $\bar{w}\Delta\bar{g} = cov(w_i, g_i) = d_c r_c var_B(g_{ij})$ . Indeed, we find that  
360  $cov(w_i, g_i) = d_c r_c var_B(g_{ij}) = 0.125$  as expected. Here, we find a nonzero covariance  
361 between classes because of a positive effect of class phenotype on baseline fitness ( $d_c = 4$ )  
362 and because of a positive association between breeding value and class phenotype ( $r_c =$   
363  $0.133$ ). These issues apply to the example of Fig. 2A in Allen et al. (2013), where there is no  
364 selection within classes, either because classes contain a single individual, because classes do  
365 not have genetic variation, or because there is no correlation between breeding value and  
366 fitness.

367

368 In the examples provided in Fig. 2B and 2C there is both selection within classes and a  
369 nonzero covariance between classes. In Fig. 2B, there is no selection within the classes with  
370 baseline fitness 0 and 5 because they lack genetic variation. However, there is selection within  
371 the class composed of individuals with baseline fitness 1, where the regression analysis within  
372 that class provides the correct estimate of the cost of the behaviour (i.e.  $\hat{c} = 1$ ), given by the  
373 regression of breeding value on class-specific fitness, as defined above. Selection within that  
374 class, however, only captures a fraction of the total selection. The other fraction is given by  
375 class-effects, which is  $d_c r_c \text{var}_B(g_{ij}) = -0.025$ . Our calculations correctly recover total  
376 selection, as given by the standard Price equation (i.e.  $\text{cov}(w_i, g_i) = -0.125$ ), for when we  
377 add together selection within classes and class-effects, we obtain  $-0.100 - 0.025 = -0.125$ ,  
378 as expected.

379  
380 Let us consider the four examples given in Fig. 3 in Nowak et al. (2017). In all four, the  
381 simple method fails because of class structure. In the example of Fig. 3A, there are three  
382 classes: (1) “blue” individuals that interact with other blue individuals; (2) “blue” individuals  
383 that interact with “red” individuals; and (3) “red” individuals that interact with “red”  
384 individuals. Because there is no genetic variation within any of these classes, there is no  
385 selection within classes, and all evolutionary change results from a nonzero covariance  
386 between classes. In the examples of Figs. 4B-4D, there are two classes defined by the baseline  
387 fitness of individuals. In all three cases, there is again no scope for selection within classes, as  
388 classes have no genetic variation, and all evolutionary change is due to a nonzero covariance  
389 between classes.

390

391

392



393 Further examples

394

395 Here, I consider cases in which there is scope for selection within classes and a nonzero  
396 covariance between classes.

397

398 *No transactions between individuals* -- Let us consider a game whereby low-fecundity  
399 individuals tend to associate with high-fecundity social partners, but no social transactions  
400 occur (Fig. 3A; cf. the Hanger-On game in Allen et al. 2013). In other words, social  
401 interactions between social partners carry neither costs ( $c = 0$ ) nor benefits (i.e.  $b = 0$ ). I first  
402 estimate costs and benefits using the simple regression method. I find that the simple method  
403 leads to the wrong estimation of costs and benefits. Specifically, it estimates a negative cost  
404 (i.e.  $\hat{c} = -4.0$ ) and a negative benefit ( $\hat{b} = -4.0$ ), and therefore it incorrectly classifies the  
405 behaviour as a selfish trait, when the behaviour is asocial (i.e.  $c = 0$  and  $b = 0$ ).

406

407 Now I estimate costs and benefits using the regression analysis based on the extended Price  
408 equation. I find that the extended regression method correctly estimates the costs and benefits  
409 of the social behaviour (i.e.  $\hat{c} = 0$  and  $\hat{b} = 0$ ). The extended version of the Price equation also  
410 explains why the simple regression method fails: it detects correlations between breeding  
411 value and class (i.e.  $r_c = 0.267$ ) and between class and fitness (i.e.  $\hat{d}_c = 8.0$ ). This is because  
412 individuals with higher breeding value have an above-average tendency to be in classes of  
413 higher fitness, and therefore there is either selection between classes or class-effects. Note  
414 that both the simple and the extended regression method correctly predict the intensity and  
415 direction of evolutionary change (i.e.  $\bar{w}\Delta\bar{g} = 0.5$ ), but only the class-based regression method  
416 correctly explains the causes of the behaviour.

417

418 *High-fecundity helpers* -- Here I consider a game in which high-fecundity individuals form  
419 one class, and low-fecundity individuals form another, and I assume that high-fecundity  
420 individuals help low-fecundity individuals (Fig. 3B; cf. Fig. 2C in Allen et al. 2013). I assume  
421 that the cost of the behaviour is one (i.e.  $c = 1$ ) and the benefit is three (i.e.  $b = 3$ ; Fig. 3B).  
422 Thus, because both the cost and benefit are positive (i.e.  $c > 0$  and  $b > 0$ ), the behaviour  
423 should be classified as altruistic. I find that the simple regression method incorrectly estimates  
424 costs and benefits: it estimates a positive and incorrect cost (i.e.  $\hat{c} = 1.091$ ) and a negative  
425 and incorrect benefit (i.e.  $\hat{b} = -1.091$ ). Thus, the simple method incorrectly classifies an  
426 altruistic behaviour as spiteful.

427  
428 In contrast, the regression method based on the class-structured Price equation accurately  
429 describes the behaviour: it correctly estimates the costs and benefits of the social behaviour  
430 (i.e.  $\hat{c} = 1$  and  $\hat{b} = 3$ , and it explains why the simple regression method fails, for it detects  
431 correlations between breeding value and class (i.e.  $r_c = -0.296$ ) and between class and mean  
432 fitness (i.e.  $\hat{d}_c = 6.0$ ). That is, individuals with higher breeding value have a tendency to be in  
433 classes of lower mean fitness. As before, both methods correctly predict the direction and  
434 intensity of evolutionary change ( $\bar{w}\Delta\bar{g} = -0.375$ ), but only the extended method generates  
435 the correct causal model for the evolution of the behaviour.

436  
437 *Harm by low-fecundity individuals* -- Now consider a game in which a low-fecundity  
438 individual inflicts a cost on a high-fitness social partner at a cost to itself (Fig. 3C; cf. Fig. 2B  
439 in Allen et al. 2013). I assume that the behaviour entails a cost of 0.5 (i.e.  $c = 0.5$ ), and a  
440 benefit of  $-0.5$  (i.e.  $b = -0.5$ ). Because the cost is positive but the benefit is negative, the  
441 behaviour is classified as spiteful. Here the simple regression method incorrectly estimates the

442 costs and benefits ( $\hat{c} = 0.636$  and  $\hat{b} = 3.366$ ). Because both the cost and benefit are positive,  
443 the model incorrectly classifies a spiteful behaviour as altruistic.

444  
445 Again, the extended method yields the correct explanation of the behaviour, for it correctly  
446 estimates the costs and benefits of the behaviour ( $\hat{c} = 0.5$  and  $\hat{b} = -0.5$ ) and correctly  
447 classifies the behaviour as spiteful. It also clarifies why the simple method fails by detecting  
448 correlations between breeding value and class (i.e.  $r_c = 0.157$ ) and between class  
449 membership and mean fitness (i.e.  $\hat{d}_c = 7.67$ ). As in the previous examples, both methods  
450 correctly predict the selection differential (i.e.  $\bar{w}\Delta\bar{g} = 0.281$ ), but only the extended method  
451 correctly explains the causal reasons underlying changes in gene frequency.

452

### 453 **A closer look at class-effects**

454

455 Above, we saw that the class-based regression method explains why the simple regression  
456 method fails in previous literature and in each of the three examples. In all cases there is a  
457 nonzero covariance between classes (either selection or class-effects). That is, there is a  
458 correlation between breeding value and class membership and between class and mean  
459 fitness. The correlation between breeding value and class is a confounding factor when one  
460 uses the simple regression method to estimate costs and benefits, which breaks down as a  
461 result. The class-based Price equation captures this “confounding” factor. The confounding  
462 factor may be a real biological phenomenon, or an artefact of artificial datasets used to  
463 illustrate a hypothetical game. If one specifies that low-fecundity individuals help high-  
464 fecundity individuals, then one ought to take into account the distribution of co-operator and  
465 defector genotypes among the different classes. If one does not, then one is implicitly  
466 assuming that resident and mutant alleles are identically distributed across the different

467 classes. However, the datasets presented above do not fulfil this assumption. For instance, if  
468 the dataset is generated at random, then the size of the population and the number of  
469 replicates will influence the distribution of genotypes among the different classes. If the  
470 probabilities of being a high- or low-fecundity individual are both  $\frac{1}{2}$ , irrespective of their  
471 breeding value, then certain genotypes can be over-represented in high-fecundity classes  
472 when the population size is small.

473  
474 We can illustrate this point by generating random datasets as a function of population size  
475 (see Fig. 4). As anticipated, I find that as the size of the population increases, the class  
476 coefficient tends to zero ( $r_c \rightarrow 0$ ), and therefore class-effects vanish (Fig. 4). This is because if  
477 a population is sufficiently large, the wild-type and mutant allele tend to become equally  
478 distributed among the different classes. In contrast, small population sizes contain sampling  
479 biases, in which the proportions of wild-type and mutant alleles in each class are not  
480 balanced. Alternatively, if the population size is small, but we simulate a sufficiently large  
481 number of replicates, the cumulative effect of selection among classes also vanishes (Fig. 4).  
482 Note that the data sets used in Allen et al. (2013) and Nowak et al. (2017) contain precisely  
483 such sampling bias.

484

### 485 **The elements of the Price equation**

486

487 Each element of the Price equation provides a description of the different processes that  
488 contribute to change in average gene frequency. The frequency of individuals in each class  
489 measures the impact of each environment on the intensity of selection. This occurs, for  
490 instance, whenever habitats are subdivided into different types. All else being equal, marginal  
491 environments (sinks), in which individuals occur at lower frequencies, contribute less to

492 selection than core environment (sources), in which individuals occur at higher frequencies.  
493 Thus, the frequency of individuals in each environment is crucial when measuring the  
494 influence of each habitat on selection, a classical result (Pulliam 1988). Reproductive value  
495 converts current selective pressures into long-term evolutionary change, for an individual in a  
496 high-fitness class leaves more descendants than average, and therefore high-fitness  
497 individuals are the ancestors of a disproportional number of individuals in future populations.  
498 In contrast, individuals that leave no descendants do not contribute to selection through direct  
499 reproduction and therefore their reproductive value is zero. The covariances within each class  
500 provide a mechanism to standardise the effect of breeding value on fitness by removing class-  
501 effects. Variation in weight, size, or body fat, for instance, may be due to environmental  
502 factors, rather than the action of genes. The class-specific regression analysis ensures that  
503 these environmental effects are stripped away from the changes that are due to the action of  
504 natural selection. And the last term in the Price equation captures the statistical association  
505 between breeding value and class. This effectively separates class-effects from selection  
506 within classes (including kin selection), which is captured by the covariances within each  
507 class.

508

### 509 **Further considerations**

510

511 In the examples outlined above, I have considered games where individuals vary in their  
512 baseline fecundity and where social interactions affect the fecundity of actor and recipient. I  
513 showed that as long as baseline fecundity is not transmitted from parents to offspring, the  
514 reproductive value of offspring can be neglected in Hamilton's rule, as only the correlations  
515 between maternal fecundity and breeding value affect the direction of selection acting on  
516 social behaviour. In that scenario, Hamilton's rule assumes its standard form (Hamilton 1963,

517 Charnov 1977), where the key quantities are the costs and benefits of the social behaviour and  
518 the relatedness of the actors and recipients.

519

520 In other types of games, for example where survival may vary with class, the reproductive  
521 values of actors and recipients must be taken into account. In such cases, Hamilton's rule  
522 deviates from its more common form, in which the costs and benefits of the social behaviour  
523 must be weighted by the future reproductive value of actor and recipient, respectively (e.g.  
524 Rodrigues 2018). This was foreshadowed by Hamilton in his use of *life-for-life* coefficients of  
525 relatedness, which include reproductive values (Hamilton 1972). More generally, the  
526 approach developed here can be applied to many other types of behaviour, including those in  
527 which there are correlations between maternal and offspring quality.

528

529 It is important in evolutionary genetics to separate changes in gene frequency ascribed to  
530 natural selection from changes in gene frequency that are not due to the action of genes.  
531 Fisher pioneered this approach by developing mathematics of gene frequency change that  
532 correct for non-adaptive effects (Fisher 1930). Reproductive value and class frequency are  
533 crucial concepts in the mathematics of adaptive gene frequency change (Fisher 1930, Taylor  
534 1990, Taylor and Frank 1996, Grafen 2006). The Price equation derived above follows the  
535 same principles. Each element of the Price equation corrects gene frequency changes for non-  
536 adaptive processes.

537

538 In the illustrative examples, I defined classes according to baseline fecundity. More generally,  
539 classes can be defined by any phenotypic, behavioural, or social marker (Rodrigues and  
540 Gardner 2013). For instance, we may need to classify individuals according to their size, large  
541 and small, and their social status, dominant or subordinate. The structure of the population

542 may often require the classification of individuals along multiple dimensions, such as size,  
543 age, and social status.

544

545 As discussed above, reproductive value converts current selective pressures into long-term  
546 adaptive changes (Fisher 1930, Taylor 1990, Grafen 2006, Gardner 2015). But if we are only  
547 interested in short-term evolutionary changes, then we simply set reproductive values to one,  
548 and the contribution to the offspring population is directly given either by the fecundity or  
549 survival of individuals in the current generation.

550

## 551 **Conclusion**

552

553 The Price equation and the regression method developed in this article provide a general  
554 framework for analysing social evolution in class-structured populations. This analysis  
555 confirms the pivotal role that Hamilton's rule plays in explaining social behaviour. The  
556 conditions stated here for the evolution of a social behaviour can be traced back to Hamilton's  
557 original derivation and his subsequent work on inclusive fitness.

558

## 559 **Acknowledgements**

560

561 I thank Andy Gardner and Steve Stearns for comments and helpful discussion.

562

## 563 **References**

564

565 Akçay, E., and J. Van Cleve. 2016. There is no fitness but fitness, and the lineage is its bearer.  
566 *Philosophical Transactions of the Royal Society B* **371**:20150085.

- 567 Allen, B., M. A. Nowak, and E. O. Wilson. 2013. Limitations of inclusive fitness.  
568 Proceedings of the National Academy of Sciences of the USA **110**:20135-20139.
- 569 Birch, J. 2014. Hamilton's rule and its discontents. British Journal for the Philosophy of  
570 Science **65**:381-411.
- 571 Birch, J., and S. Okasha. 2015. Kin selection and its critics. Bioscience **65**:22-32.
- 572 Boomsma, J. J. 2009. Lifetime monogamy and the evolution of eusociality. Philosophical  
573 Transactions of the Royal Society B **364**:3191-3207.
- 574 Bourke, A. F. G. 2011. Principles of Social Evolution. Oxford University Press, Oxford, UK.
- 575 Charnov, E. L. 1977. An elementary treatment of the genetical theory of kin-selection. Journal  
576 of Theoretical Biology **66**:541-550.
- 577 Charnov, E. L. 1982. The Theory of Sex Allocation. Princeton University Press, Princeton,  
578 N.J.
- 579 Clobert, J., M. Baquette, T. G. Benton, and J. M. Bullock. 2012. Dispersal Ecology and  
580 Evolution. Oxford University Press, Oxford, UK.
- 581 Darwin, C. R. 1859. On the Origin of Species by Means of Natural Selection, or, the  
582 Preservation of Favoured Races in the Struggle for Life. John Murray, London, UK.
- 583 Davies, N. B., J. R. Krebs, and S. A. West. 2012. An Introduction to Behavioral Ecology. 4th  
584 edition. Blackwell, Oxford, UK.
- 585 Fisher, R. A. 1930. The Genetical Theory of Natural Selection. Clarendon Press, Oxford, UK.
- 586 Frank, S. A. 1997. The Price equation, Fisher's fundamental theorem, kin selection, and  
587 causal analysis. Evolution **51**:1712-1729.
- 588 Frank, S. A. 1998. Foundations of Social Evolution. Princeton University Press, Princeton,  
589 NJ.
- 590 Frank, S. A. 2012. Natural selection. IV. The Price equation. Journal of Evolutionary Biology  
591 **25**:1002-1019.
- 592 Gadagkar, R. 2016. Evolution of social behaviour in the primitively eusocial wasp *Ropalidia*  
593 *marginata*: do we need to look beyond kin selection? Philosophical Transactions of  
594 the Royal Society B **371**:20150094.
- 595 Gardner, A. 2008. The Price equation. Current Biology **18**:R198-R202.
- 596 Gardner, A. 2015. The genetical theory of multilevel selection. Journal of Evolutionary  
597 Biology **28**:305-319.
- 598 Gardner, A. 2020. Price's equation made clear. Philosophical Transactions of the Royal  
599 Society B **375**:20190361.



- 600 Gardner, A., S. A. West, and G. Wild. 2011. The genetical theory of kin selection. *Journal of*  
601 *Evolutionary Biology* **24**:1020-1043.
- 602 Grafen, A. 1985. A geometric view of relatedness. *Oxford Surveys in Evolutionary Biology*  
603 **2**:28–90.
- 604 Grafen, A. 2000. Developments of the Price equation and natural selection under uncertainty.  
605 *Proceedings of the Royal Society B* **267**:1223-1227.
- 606 Grafen, A. 2006. A theory of Fisher's reproductive value. *Journal of Mathematical Biology*  
607 **53**:15-60.
- 608 Grafen, A. 2015. Biological fitness and the Price Equation in class-structured populations.  
609 *Journal of Theoretical Biology* **373**:62-72.
- 610 Haig, D. 2002. *Genomic Imprinting and Kinship*. Rutgers University Press, New Brunswick,  
611 N.J.
- 612 Hamilton, W. D. 1963. Evolution of altruistic behavior. *The American Naturalist* **97**:354-356.
- 613 Hamilton, W. D. 1964a. The genetical evolution of social behaviour. I. *Journal of Theoretical*  
614 *Biology* **7**:1-16.
- 615 Hamilton, W. D. 1964b. The genetical evolution of social behaviour. II. *Journal of*  
616 *Theoretical Biology* **7**:17-52.
- 617 Hamilton, W. D. 1970. Selfish and spiteful behaviour in an evolutionary model. *Nature*  
618 **228**:1218-1220.
- 619 Hamilton, W. D. 1972. Altruism and related phenomena, mainly in social insects. *Annual*  
620 *Review of Ecology and Systematics* **3**:193-232.
- 621 Hamilton, W. D. 1975. Innate social aptitudes of man: an approach from evolutionary  
622 genetics. Pages 133-155 *in* R. Fox, editor. *Biosocial Anthropology*, Wiley, New York.
- 623 Hamilton, W. D., and R. M. May. 1977. Dispersal in stable habitats. *Nature* **269**:578-581.
- 624 Lande, R., and S. J. Arnold. 1983. The measurement of selection on correlated characters.  
625 *Evolution* **37**:1210-1226.
- 626 Maynard Smith, J. M., and E. Szathmáry. 1995. *The Major Transitions in Evolution*. W.H.  
627 Freeman Spektrum, Oxford, UK.
- 628 Moore, A. J., E. D. Brodie, and J. B. Wolf. 1997. Interacting phenotypes and the evolutionary  
629 process .1. Direct and indirect genetic effects of social interactions. *Evolution*  
630 **51**:1352-1362.
- 631 Nowak, M. A., A. McAvoy, B. Allen, and E. O. Wilson. 2017. The general form of  
632 Hamilton's rule makes no predictions and cannot be tested empirically. *Proceedings of*  
633 *the National Academy of Sciences of the USA* **114**:5665-5670.

- 634 Okasha, S. 2006. *Evolution and the Levels of Selection*. Oxford University Press, Oxford,  
635 UK.
- 636 Okasha, S. 2016. On Hamilton's rule and inclusive fitness theory with nonadditive payoffs.  
637 *Philosophy of Science* **83**:873-883.
- 638 Price, G. R. 1970. Selection and covariance. *Nature* **227**:520-521.
- 639 Price, G. R. 1972. Extension of covariance selection mathematics. *Annals of Human Genetics*  
640 **35**:485-490.
- 641 Pulliam, H. R. 1988. Sources, sinks, and population regulation. *The American Naturalist*  
642 **132**:652-661.
- 643 Queller, D. C. 1992a. A general model for kin selection. *Evolution* **46**:376-380.
- 644 Queller, D. C. 1992b. Quantitative genetics, inclusive fitness, and group selection. *The*  
645 *American Naturalist* **139**:540-558.
- 646 Queller, D. C. 2017. Fundamental theorems of evolution. *The American Naturalist* **189**:345-  
647 353.
- 648 Rodrigues, A. M. M. 2018. Demography, life history and the evolution of age-dependent  
649 social behaviour. *Journal of Evolutionary Biology* **31**:1340-1353.
- 650 Rodrigues, A. M. M., and A. Gardner. 2013. Evolution of helping and harming in  
651 heterogeneous groups. *Evolution* **67**:2284-2298.
- 652 Rousset, F. 2015. Regression, least squares, and the general version of inclusive fitness.  
653 *Evolution* **69**:2963-2970.
- 654 Taylor, P. D. 1990. Allele-frequency change in a class-structured population. *The American*  
655 *Naturalist* **135**:95-106.
- 656 Taylor, P. D., and S. A. Frank. 1996. How to make a kin selection model. *Journal of*  
657 *Theoretical Biology* **180**:27-37.
- 658 Trivers, R. L. 1974. Parent-offspring conflict. *American Zoologist* **14**:249-264.
- 659 van Veelen, M. 2009. Group selection, kin selection, altruism and cooperation: When  
660 inclusive fitness is right and when it can be wrong. *Journal of Theoretical Biology*  
661 **259**:589-600.
- 662 West, S. A. 2010. *Sex Allocation*. Princeton University Press, Princeton, NJ.
- 663 West, S. A., and A. Gardner. 2013. Adaptation and inclusive fitness. *Current Biology*  
664 **23**:R577-R584.
- 665 Whiteley, M., S. P. Diggle, and E. P. Greenberg. 2017. Progress in and promise of bacterial  
666 quorum sensing research. *Nature* **551**:313-320.

667 Wilson, D. S., and E. O. Wilson. 2007. Rethinking the theoretical foundation of sociobiology.  
668 Quarterly Review of Biology **82**:327-348.

669

670

## 671 Figure Legends

672

673 **Figure 1.** Acyclic direct graph describing the dynamics of the population. The left-most  
674 population is the parental population, while the middle and right-most populations are the  
675 descendant populations. The colour of each entity represents the breeding value of an  
676 individual, while shape represents their class. **A.** Visual depiction of the standard Price  
677 equation where no variation in quality is considered. **B.** The dynamics of a population when  
678 individuals vary in quality. The left-most panel represents the current population at time  $t_0$ ,  
679 while the second panel represents the population in the next time step (i.e.  $t = t_0 + 1$ ). The  
680 right-most panel represents a descendant population in the distant future (i.e.  $t \gg t_0$ ).

681

682 **Figure 2.** Path diagram with the causal model describing the association between breeding  
683 value and fitness. Fitness ( $w$ ) depends on the breeding value of the focal individuals ( $g$ ), on  
684 the breeding value of the focal's social partners ( $G$ ) and on class phenotype ( $\sigma$ ). **A.** Each edge  
685 is weighted by a partial coefficient of correlation. **B.** Each edge corresponds to a variable in  
686 Hamilton's rule. For instance, the direct association between fitness and breeding value is the  
687 additive inverse of the behaviour's cost ( $-c$ ), the association between breeding values gives  
688 the relatedness coefficient ( $r$ ), and the association between breeding value and class  
689 phenotype gives the class coefficient ( $r_c$ ).

690

691 **Figure 3.** Representation of each evolutionary game. Colour represents breeding value, shape  
692 represents baseline fecundity, and numbers represent baseline fecundity with the

693 corresponding increments or decrements owing to social interactions. **A.** Individuals associate  
 694 with each other but no actual social transactions occur. **B.** Intermediate-fecundity individuals  
 695 help low-fecundity individuals. **C.** Low-fecundity individuals harm high-fecundity  
 696 individuals.

697

698 **Figure 4.** Between-class covariance as a function of population size for different replicates. If  
 699 population size is relatively small, sampling biases will cause some genotypes to occur at  
 700 higher frequency in one of the classes. Sampling biases generate a correlation between  
 701 breeding value and mean fitness. When the population is relatively large, however, sampling  
 702 biases will become less prominent, and the covariance between breeding value and mean  
 703 fitness tends to vanish.

704

705

**Figures**

706

707 **Figure 1.**

708

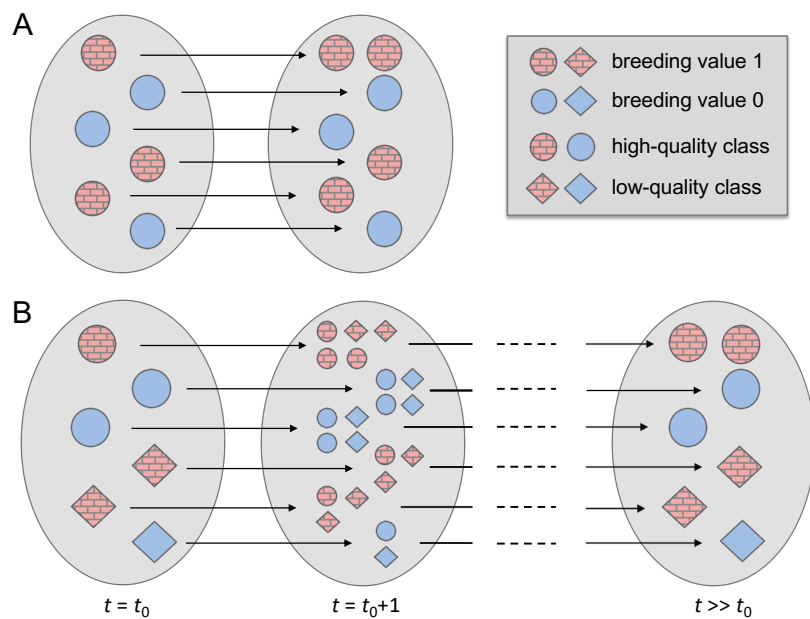

709

710 **Figure 2.**

711

712

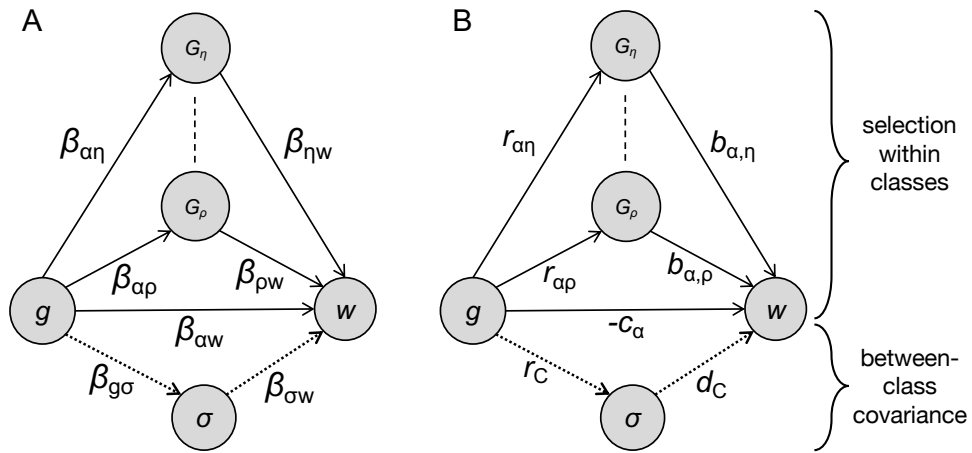

713

714

715 **Figure 3.**

716

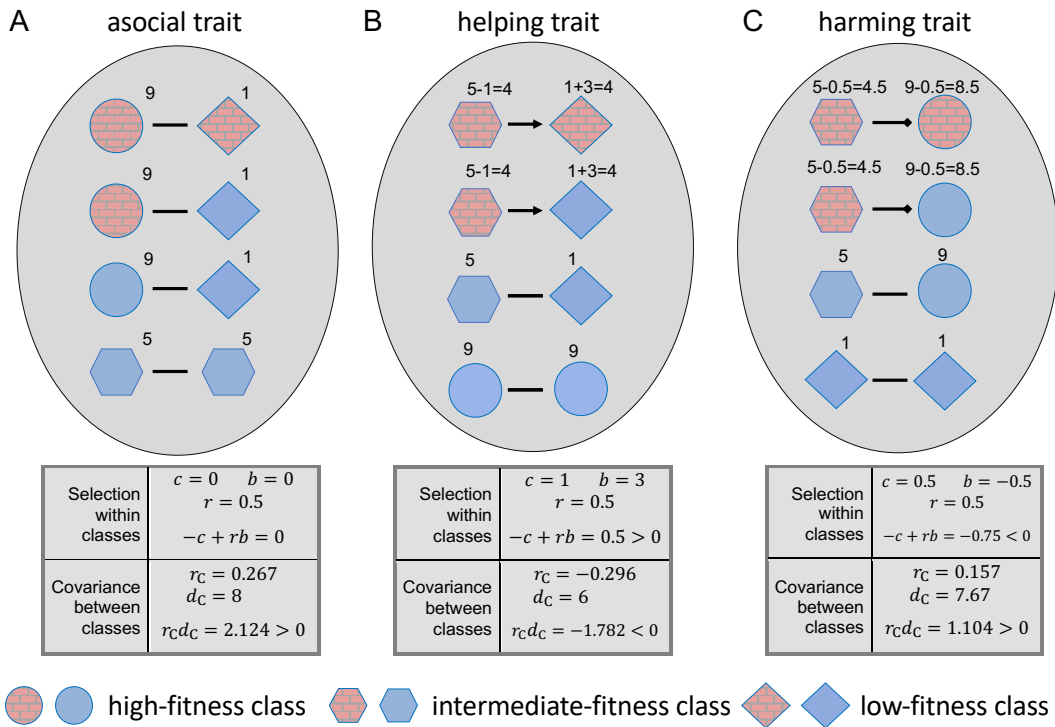

717

718

719

720 **Figure 4.**

721

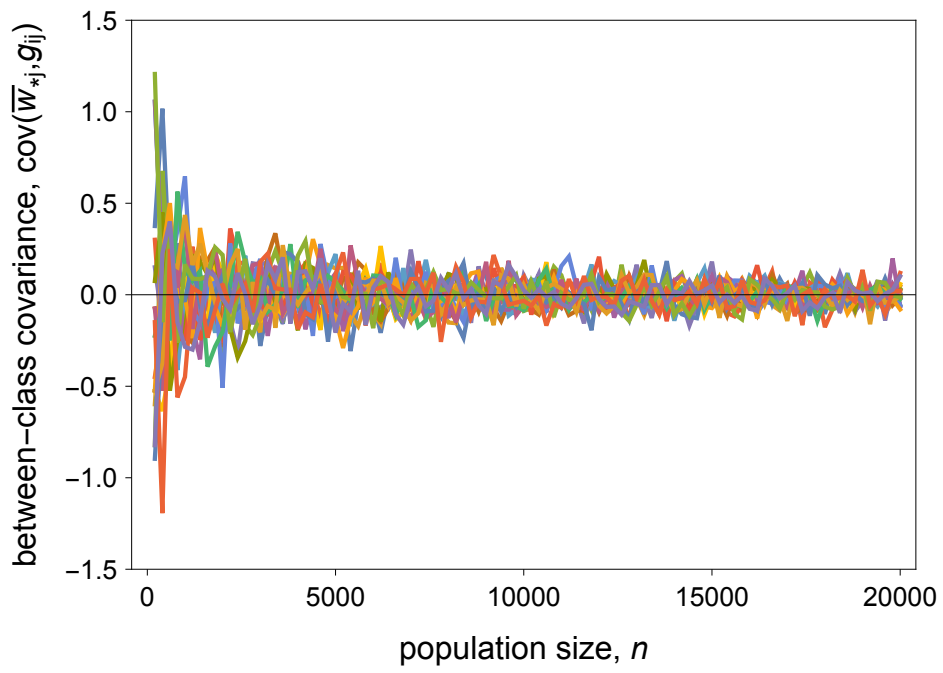

722

723

724

725

726

727

728

729

730
